# Supplementary material for: NN bond cleavage of azobenzene via photocatalytic hydrogenation with Dy-doped Zn(O,S): the progress from hydrogen evolution to green chemical conversion
Source: Royal Society of Chemistry journal article supplement (doi:10.1039/c9cy00502a), 2019-01-01
Supplement: c9cy00502a1.pdf [file c9cy00502a1.pdf]

## Supplementary Data

### **N=N bond cleavage of azobenzene *via* photocatalytic hydrogenation with Dy-doped Zn(O,S) : The progress from hydrogen evolution to green chemical conversion**

Hairus Abdullah, Dong-Hau Kuo\*, Noto Susanto Gultom

*Department of Materials Science and Engineering, National Taiwan University of Science and Technology, No.43, Sec. 4, Keelung Road, Taipei 10607, Taiwan*

\*Fax: +011-886-2-27303291. E-mail: [dhkuo@mail.ntust.edu.tw](mailto:dhkuo@mail.ntust.edu.tw)

**Table S1** EDS analysis results of as-prepared Dy-Zn(O,S) catalysts with different Dy contents

| Catalyst system | Elements in Catalyst |        |        |        |
|-----------------|----------------------|--------|--------|--------|
|                 | Dy                   | Zn     | O      | S      |
| Dy-Zn(O,S)-0    | 0%                   | 47.96% | 27.3%  | 24.74% |
| Dy-Zn(O,S)-5    | 0.11%                | 43.99% | 27.57% | 28.37% |
| Dy-Zn(O,S)-10   | 0.89%                | 32.25% | 49.10% | 17.77% |
| Dy-Zn(O,S)-20   | 1.66%                | 37.47% | 42.32% | 18.54% |

**Table S2** XPS composition analysis for Zn(O,S) with and without Dy doping

| Catalyst      | Molar percentages |                  |                 |                 | Oxygen percentages   |                      |                  | Cation/anion ratio |
|---------------|-------------------|------------------|-----------------|-----------------|----------------------|----------------------|------------------|--------------------|
|               | Zn <sup>2+</sup>  | Dy <sup>3+</sup> | O <sup>2-</sup> | S <sup>2-</sup> | O <sub>lattice</sub> | O <sub>vacancy</sub> | O <sub>O-H</sub> |                    |
| Dy-Zn(O,S)-0  | 47.34%            | 0.00%            | 28.45%          | 24.21%          | 17.17%               | 5.37%                | 5.91%            | 1.14               |
| Dy-Zn(O,S)-10 | 46.91%            | 0.83%            | 24.98%          | 27.28%          | 17.46%               | 3.89%                | 3.63%            | 1.05               |

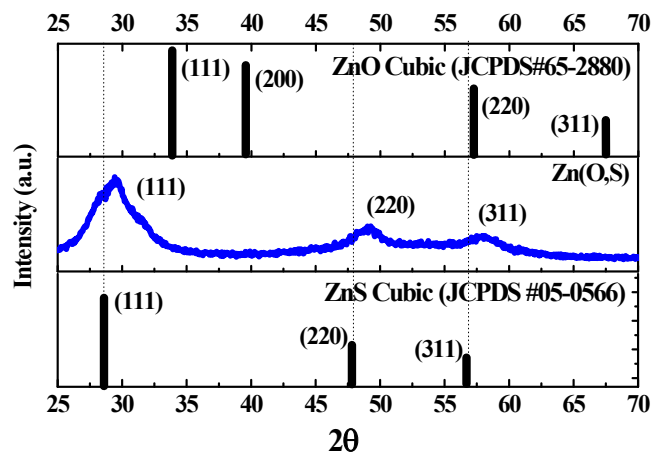

**Figure S1** XRD patterns of Zn(O,S) NPs with (111), (220), and (311) planes located between those in ZnS (JCPDS #05-0566) and ZnO cubic (JCPDS #65-2880).

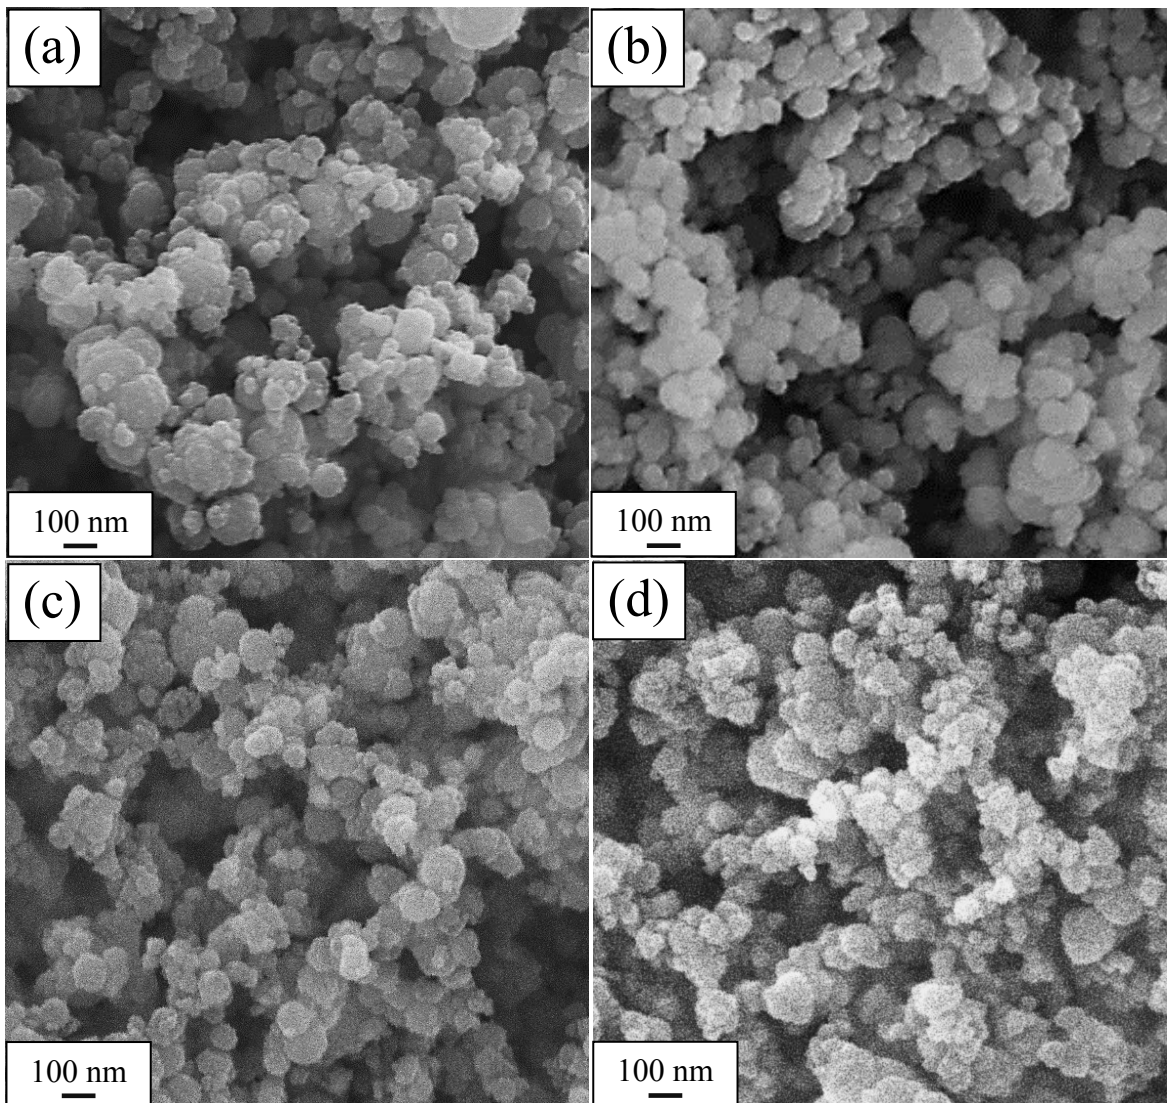

**Figure S2** SEM images of Dy-Zn(O,S) nanoparticles with Dy precursor contents prepared at (a) 0%, (b) 5%, (c) 10%, and (d) 20%.

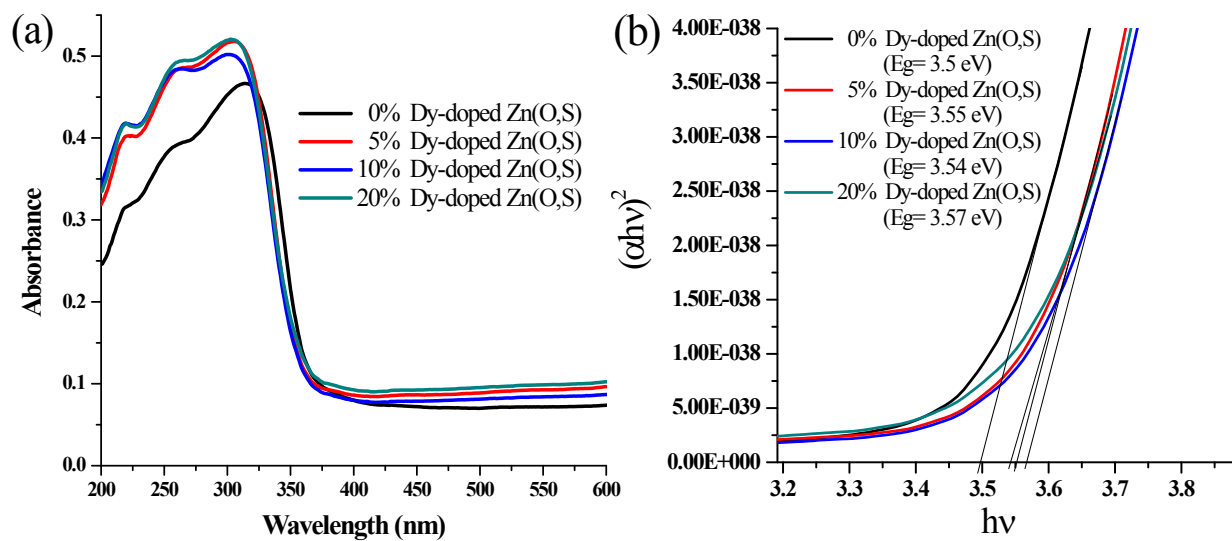

**Figure S3** (a) Diffuse reflectance spectra and (b) its converted Tauc plots of Dy-Zn(O,S) prepared with different precursor amounts of 0%, 5%, 10%, and 20%.

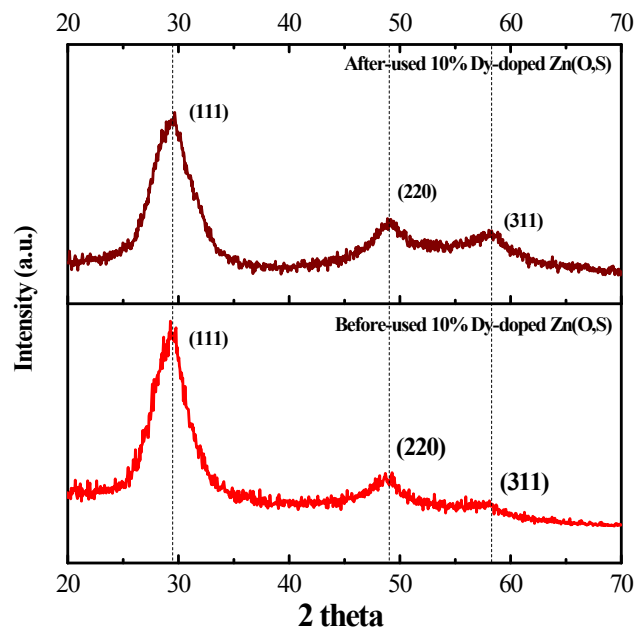

**Figure S4** XRD patterns of Dy-Zn(O,S)-10 before and after used for photocatalytic hydrogenation of 4-NP to 4-AP.

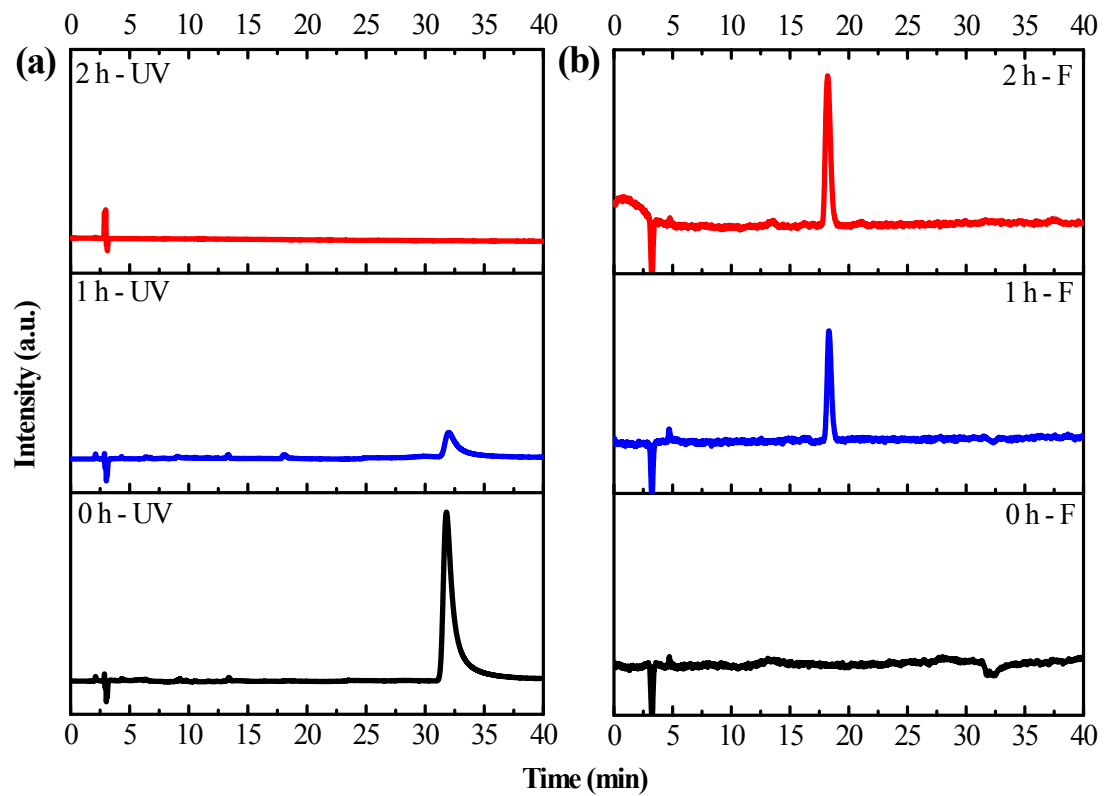

**Figure S5** High performance liquid chromatograms of (a) 4-NP and (b) 4-AP solutions after photocatalytic reduction in the presence of Dy-Zn(O,S)-10 with different reaction times using UV and fluorescent detectors, respectively.

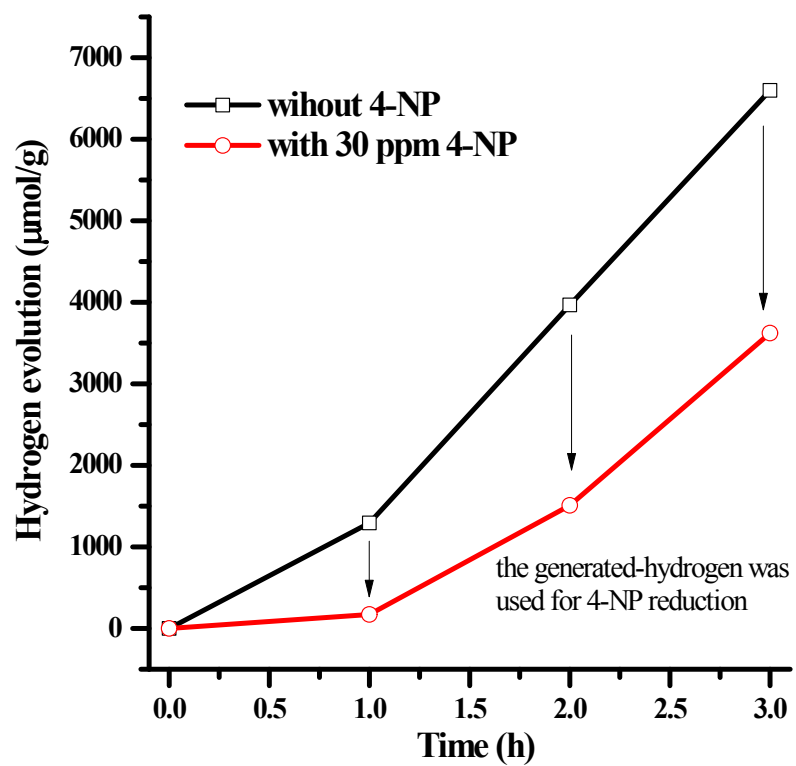

**Figure S6** Hydrogen evolution obtained from photocatalytic reaction on Dy-Zn(O,S)-10 with and without 30 ppm 4-NP in sodium sulfite solution.



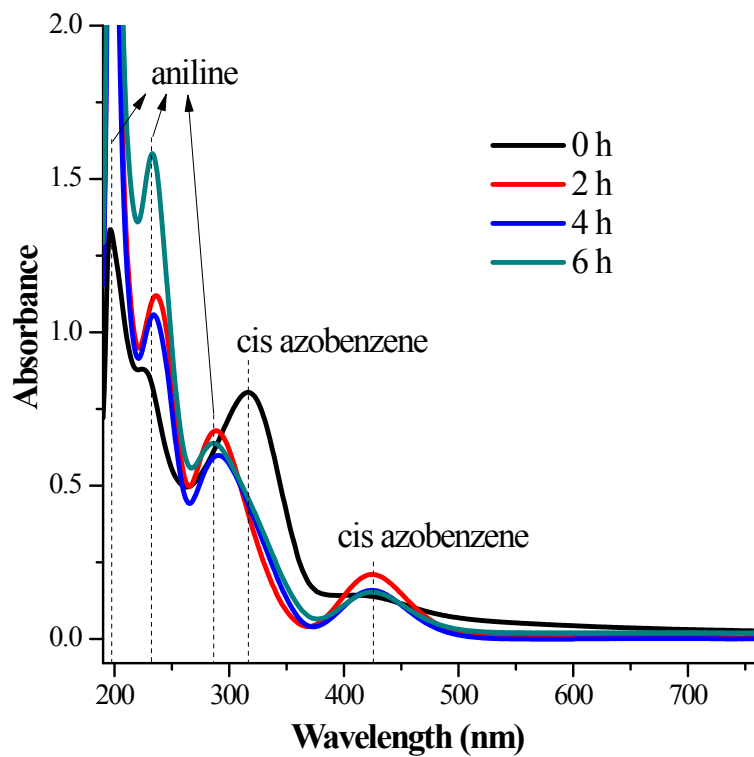

**Figure S7** UV-vis absorbance spectra of azobenzene solution with different photo reaction times in the presence of Dy-Zn(O,S)-0

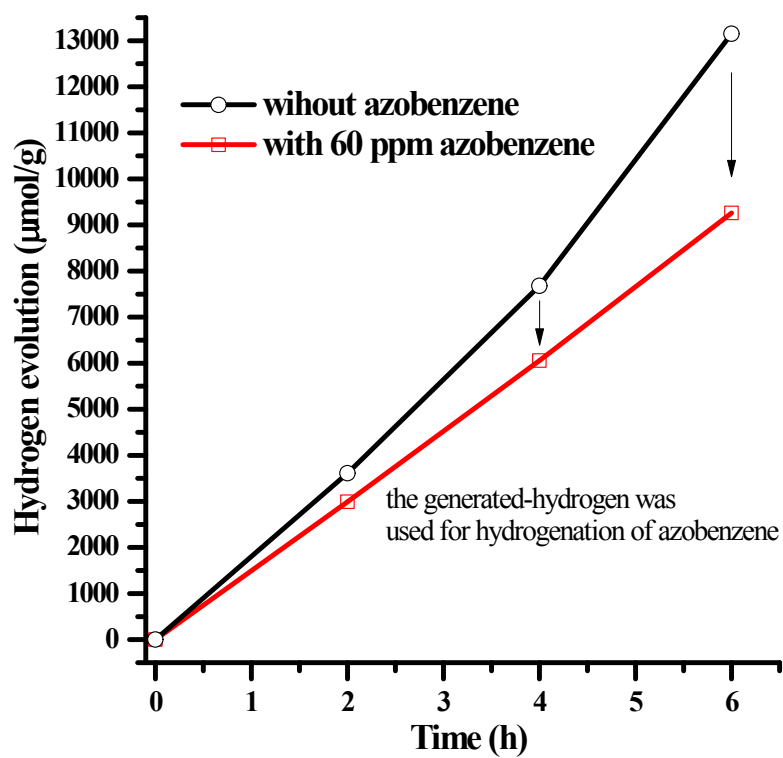

**Figure S8** Hydrogen evolution obtained from photocatalytic reaction on Dy-Zn(O,S)-10 nanoparticles with and without 60 ppm azobenzene in 10% ethanol solution.

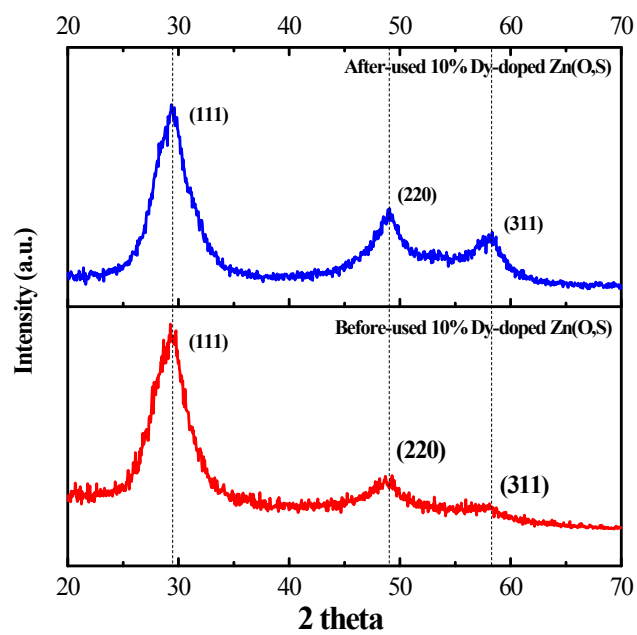

**Figure S9** XRD patterns of Dy-Zn(O,S)-10 before and after the photocatalytic hydrogenation of azobenzene to aniline.

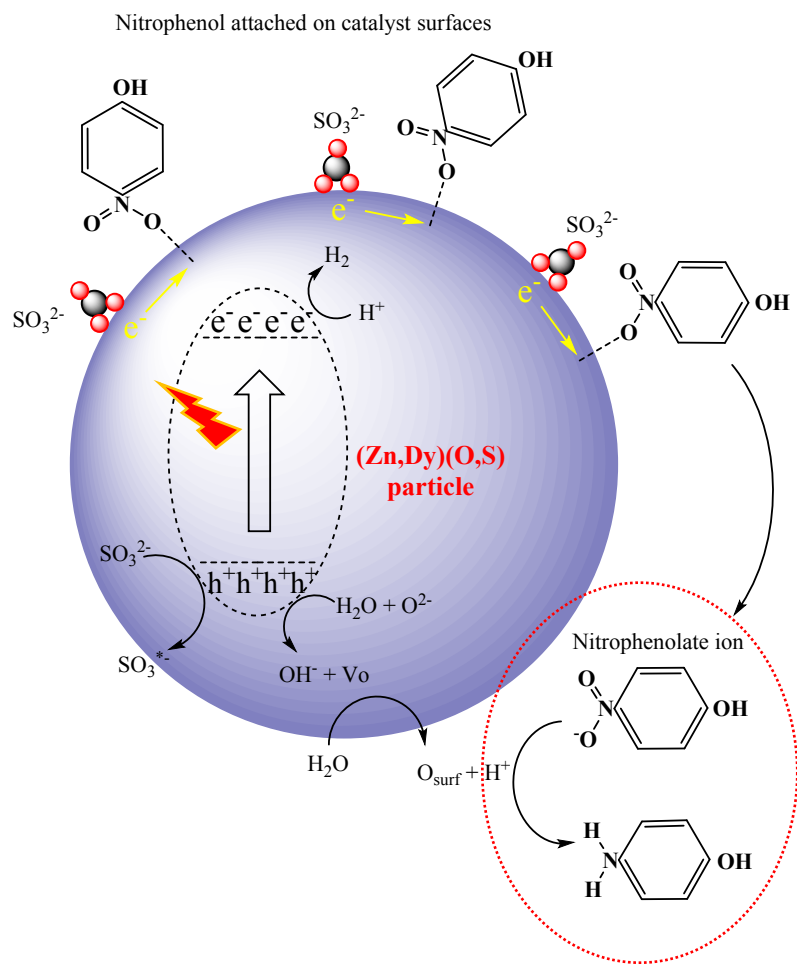

Steps of 4-nitrophenol reduction:

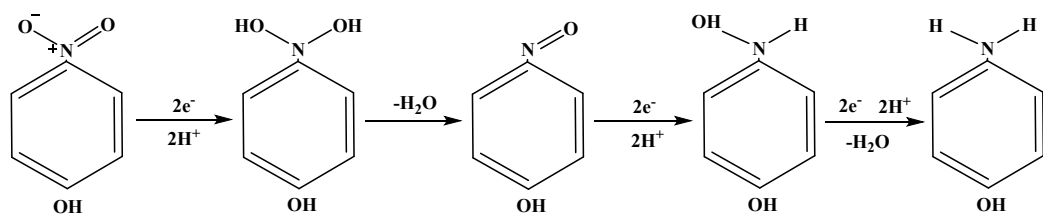

**Figure S10** Schematic mechanism of 4-nitrophenol reduction in the presence of Dy-Zn(O,S)-10 nanoparticle under low intensity of UV light illumination.

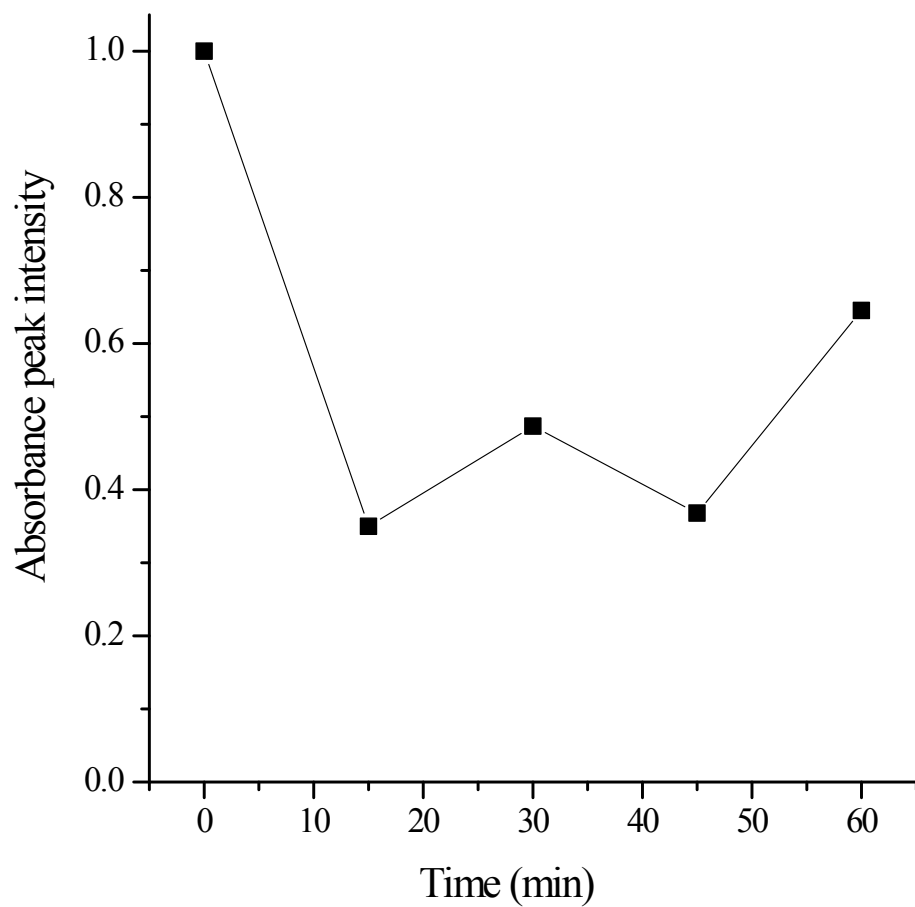

**Figure S11** Adsorption and desorption of 15 ppm azobenzene on Dy-Zn(O,S)-10 catalyst without light illumination based on the absorbance peak of cis-azobenzene at 318 nm in UV-vis absorbance spectra.
